# Supplementary material for: The Comprehensive Post-Acute Stroke Services (COMPASS) study: design and methods for a cluster-randomized pragmatic trial
Source: PubMed Central journal article supplement (PMC5513078; doi:10.1186/s12883-017-0907-1), 2017-07-17
Supplement: 12883_2017_907_MOESM1_ESM.pdf [file 12883_2017_907_MOESM1_ESM.pdf]

Stroke algorithm for case ascertainment

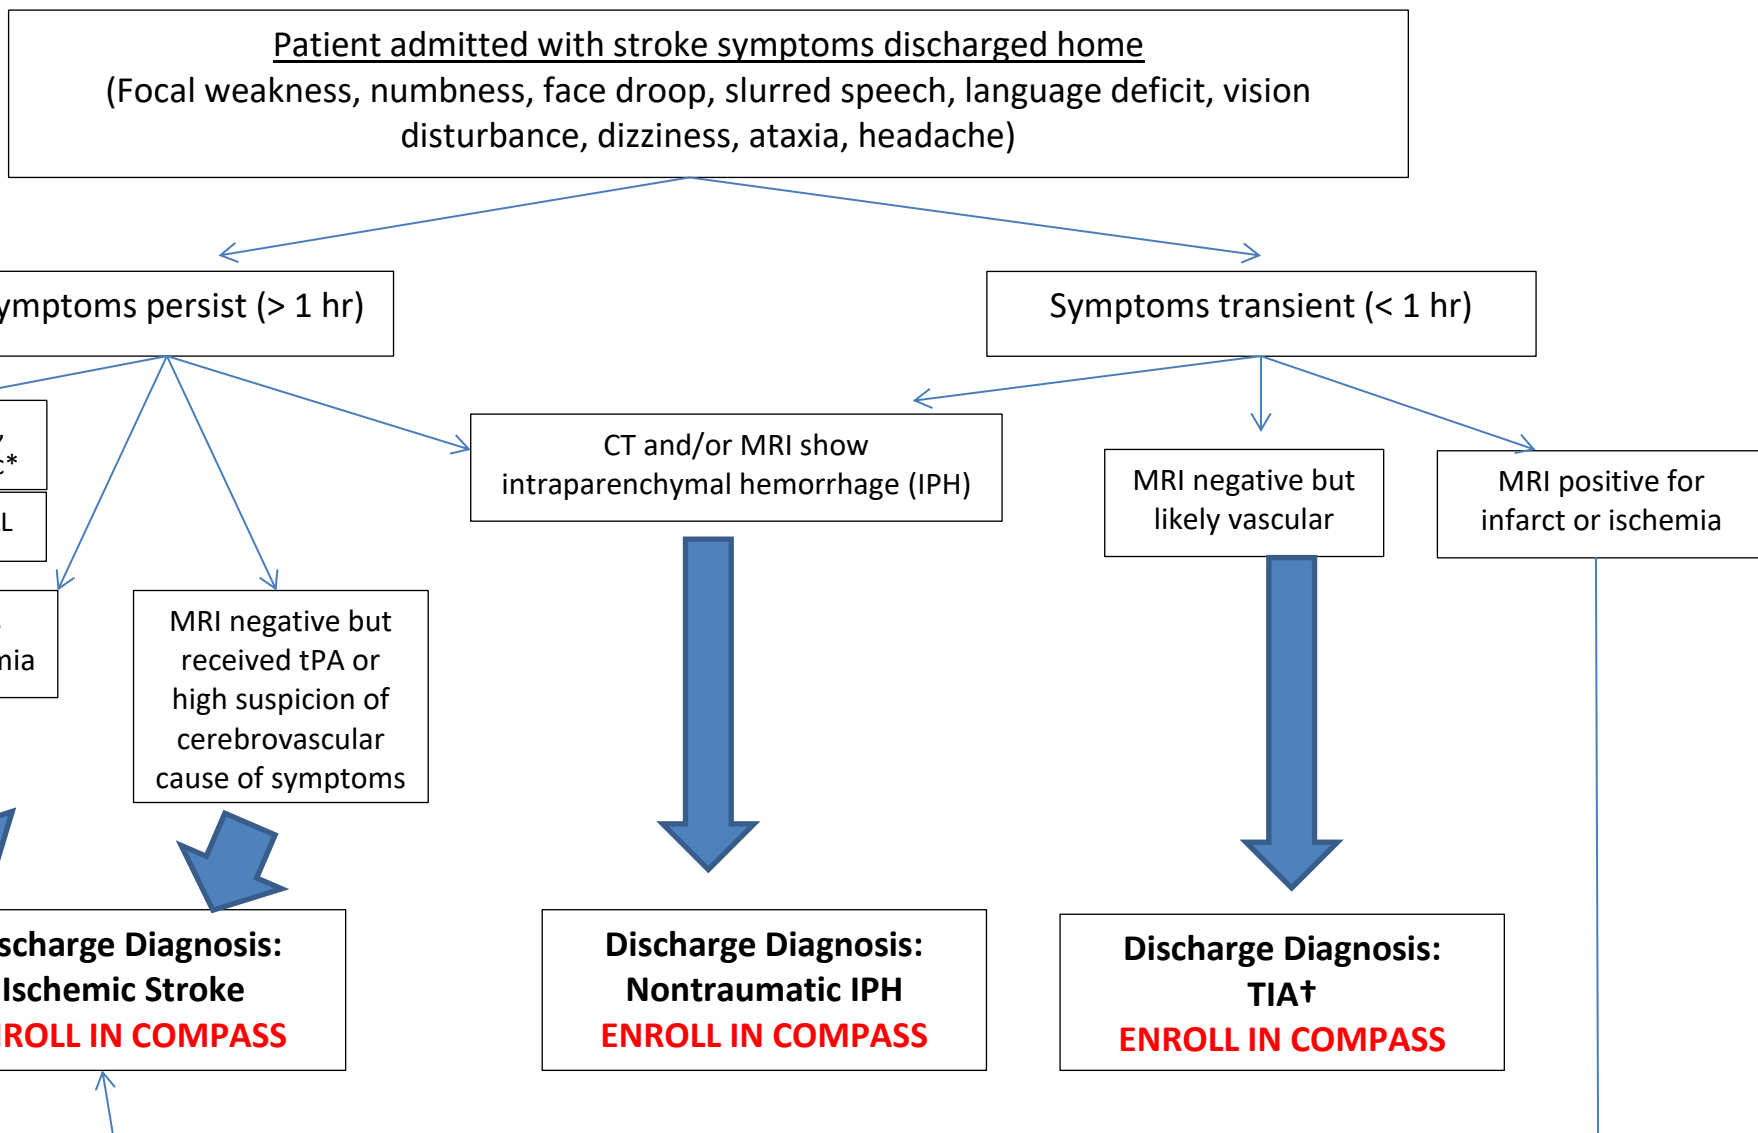

\*Discharge diagnosis is TIA vs complicated migraine, syncope, infection, reactivation of old stroke symptoms, medication reaction, delirium

†TIA definition: Transient episode of neurological dysfunction caused by focal brain, spinal cord, or retinal ischemia, without acute infarction.

Inclusion and Exclusion for TIA in COMPASS

**TIA**  
Transient episode of neurological dysfunction caused by focal brain, spinal cord, or retinal ischemia, without acute infarction. [Easton, et al Stroke 2009;40:2276-2293.]

**Discharge Diagnosis:  
TIA vs another diagnosis**

- Complicated migraine
- Infection
- Syncope
- Reactivation of old stroke symptoms
- Delirium
- Medication reaction, side effect, or intoxication
- Angina

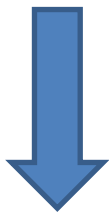

**STOP: DO NOT ENROLL IN  
COMPASS**

**Discharge Diagnosis:  
TIA**

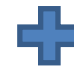

**MRI negative for ischemic  
stroke or infarct**

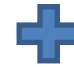

**Symptoms lasting longer than 5  
minutes**

\*The majority of TIAs last between 5 to 60 minutes, but symptoms could be longer, so there is no upper limit for symptom duration.

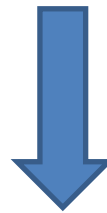

**ENROLL IN COMPASS**
